# Supplementary material for: Transcriptomics and Alternative Splicing Analyses Reveal Large Differences between Maize Lines B73 and Mo17 in Response to Aphid Rhopalosiphum padi Infestation
Source: PubMed Central journal article supplement (PMC5641392; doi:10.3389/fpls.2017.01738), 2017-10-10
Supplement: DataSheet1.pdf [file DataSheet1.pdf]

## Supplementary Material

# Transcriptomics and alternative splicing analyses reveal large differences between maize lines B73 and Mo17 in response to aphid *Rhopalosiphum padi* infestation

Juan Song, Hui Liu, Huifu Zhuang, Chunxia Zhao, Yuxing Xu, Shibo Wu, Jinfeng Qi, Jing Li, Christian Hettenhausen\*, and Jianqiang Wu\*

\*Corresponding authors

Jianqiang Wu and Christian Hettenhausen

Email: [wujianqiang@mail.kib.ac.cn](mailto:wujianqiang@mail.kib.ac.cn); [hettenhausen@mail.kib.ac.cn](mailto:hettenhausen@mail.kib.ac.cn)

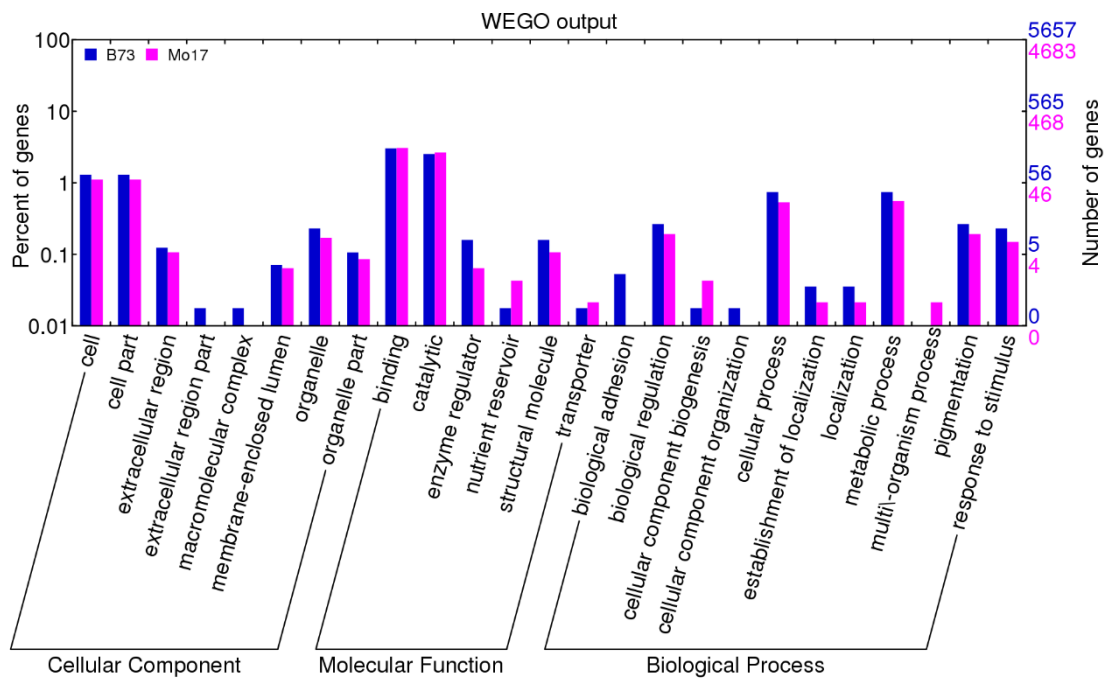

**Figure S1. Functional analysis of *R. padi* herbivory-regulated genes in B73 and Mo17 based on RNA-Seq data.**

GO functional enrichment analysis of differentially expressed genes (DEGs) in B73 and Mo17 after *R. padi* herbivory. Based on sequence homology, 7931 DEGs are summarized in three main categories: cellular component, molecular function and biological process. The X-axis expresses the definition of GO terms. The right Y-axis indicates the number of genes in each category. The left Y-axis indicates the percentage of targeted genes mapped by the GO terms. Complete data can be found in Table S3.

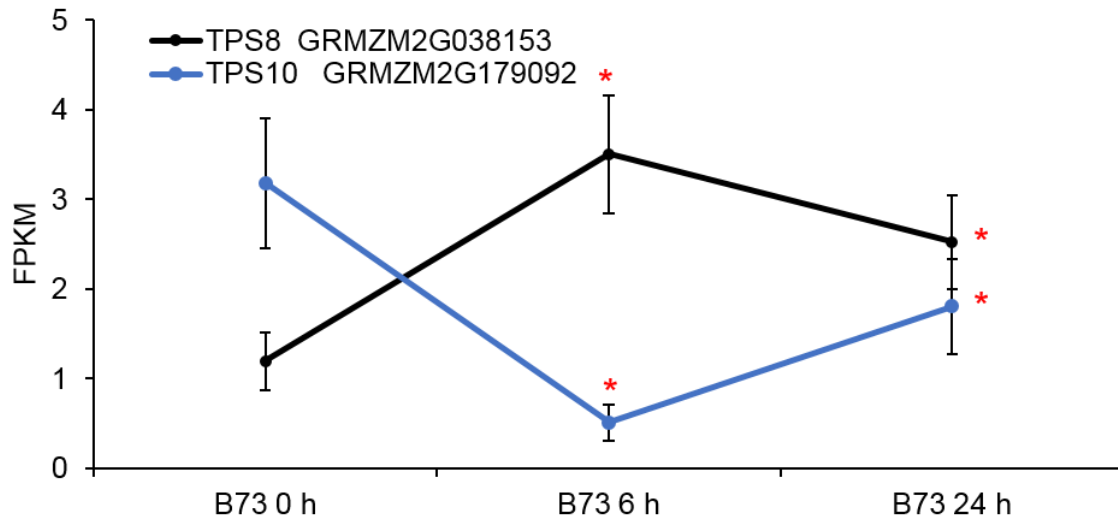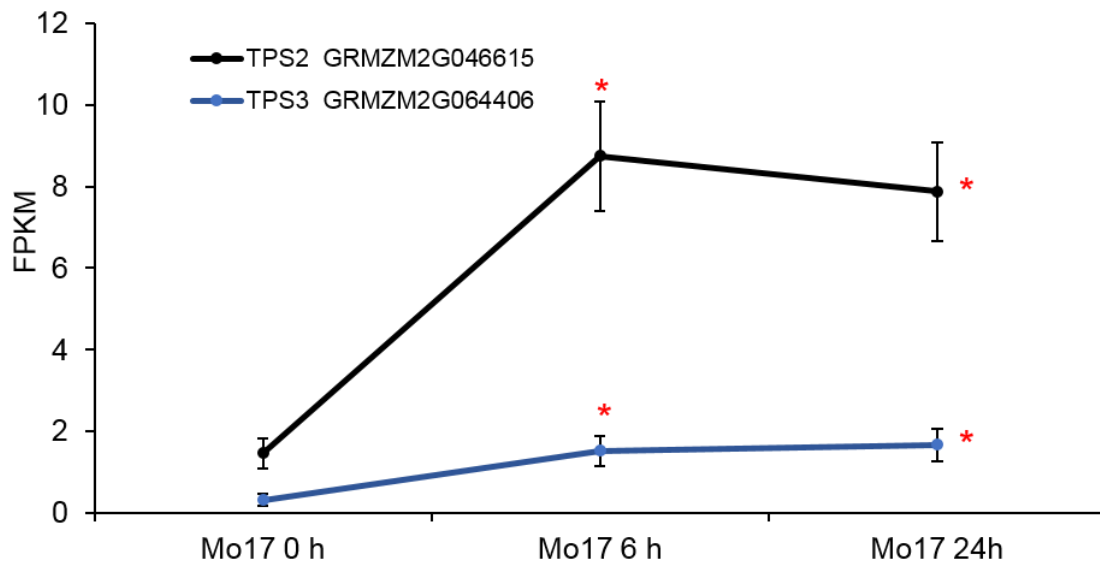

**Figure S2. Differentially expressed terpene biosynthesis genes in B73 and Mo17, in response to *R. padi* feeding.**

Maize B73 and Mo17 leaves were treated with 50 aphids per plant, and samples were collected at 6 and 24 h after *R. padi* treatment (untreated samples served as controls, depicted as 0 h). Differentially expressed genes (DEGs) in terpene biosynthesis pathways after 6 and 24 h of *R. padi* feeding in B73 (A) and Mo17 (B) are shown.

Complete data can be found in Table S8.

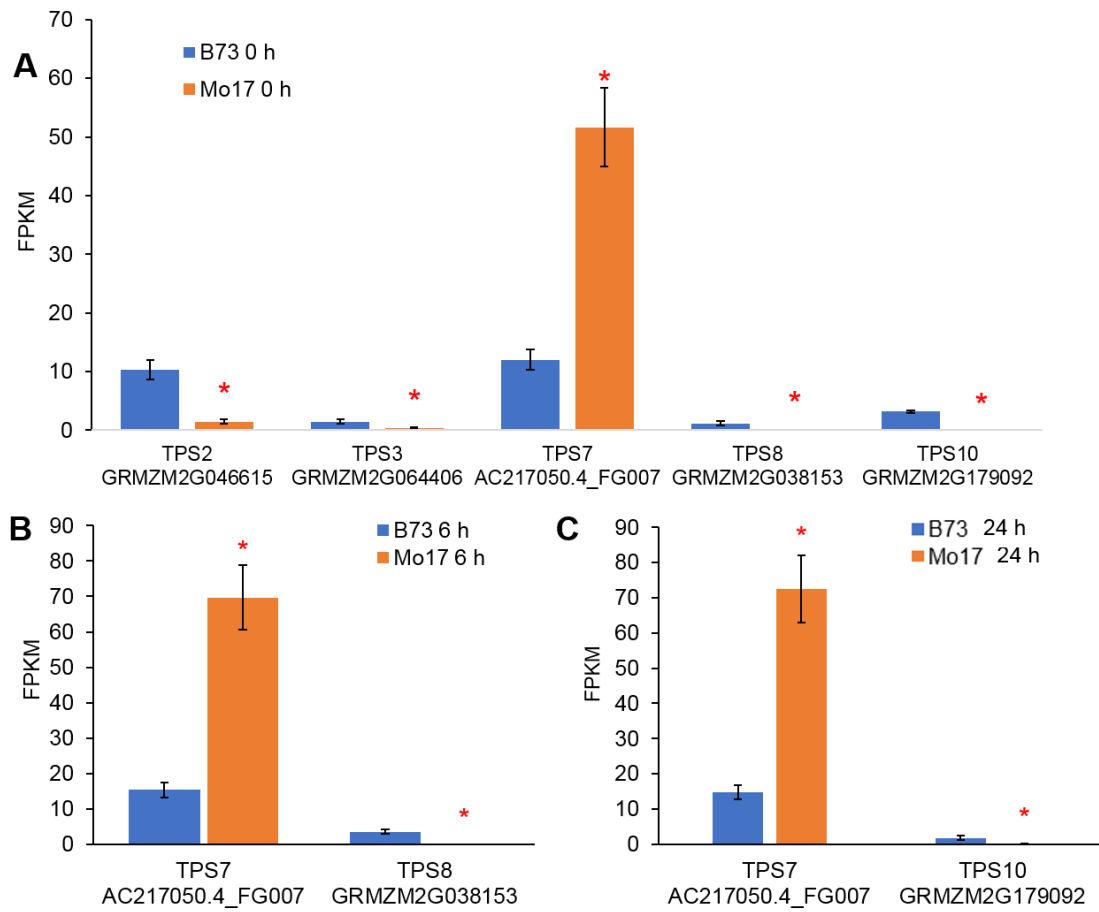

**Figure S3. Differentially expressed terpene biosynthesis genes between B73 and Mo17 with and without *R. padi* treatment.**

Maize B73 and Mo17 leaves were treated with 50 aphids per plant, and samples were collected at 6 and 24 h after *R. padi* treatment (untreated samples served as controls, depicted as 0 h). DEGs in terpene biosynthesis pathways between B73 and Mo17 without *R. padi* feeding (**A**) and after 6 (**B**) and 24 h (**C**) of *R. padi* feeding. Complete data can be found in Table S8.

| Pathway name ( DSGs B73 6 h)                   | P- value |
|------------------------------------------------|----------|
| GDP-mannose biosynthesis I                     | 1.05E-02 |
| Homoserine biosynthesis                        | 1.05E-02 |
| GDP-mannose biosynthesis II                    | 1.05E-02 |
| Ascorbate biosynthesis I (L-galactose pathway) | 1.29E-02 |
| GDP-mannose metabolism                         | 1.45E-02 |
| Lysine biosynthesis VI                         | 2.09E-02 |

  

| Pathway name ( DSGs B73 24 h)                | P- value |
|----------------------------------------------|----------|
| Anandamide degradation                       | 1.29E-02 |
| Methanol oxidation to formaldehyde           | 1.92E-02 |
| Xanthophyll cycle                            | 2.24E-02 |
| Antheraxanthin and violaxanthin biosynthesis | 2.24E-02 |
| Sulfate activation for sulfonation           | 3.50E-02 |

  

| Pathway name ( DSGs Mo17 6 h)                   | P- value |
|-------------------------------------------------|----------|
| Suberin biosynthesis                            | 1.67E-03 |
| Asparagine biosynthesis I                       | 1.92E-02 |
| Superpathway of asparagine biosynthesis         | 1.92E-02 |
| Asparagine biosynthesis II                      | 1.92E-02 |
| Salicylate biosynthesis                         | 3.58E-02 |
| Phenylpropanoid biosynthesis, initial reactions | 4.29E-02 |

  

| Pathway name ( DSGs Mo17 24 h)                  | P- value |
|-------------------------------------------------|----------|
| Myo-inositol biosynthesis                       | 1.62E-03 |
| Salicylate biosynthesis                         | 2.40E-02 |
| Phenylpropanoid biosynthesis, initial reactions | 2.88E-02 |
| Glycerol degradation I                          | 3.67E-02 |
| Lactose degradation III                         | 3.82E-02 |
| Suberin biosynthesis                            | 4.29E-02 |

**Figure S4. The pathways enriched in the differentially spliced genes in response to *R. padi* infestation in B73 and Mo17.**

Maize B73 and Mo17 leaves were treated with 50 aphids per plant, and samples were collected at 6 and 24 h after *R. padi* treatment (untreated samples served as controls).

MetGenMAP was used for pathway enrichment analysis to identify metabolic functions of the differentially spliced genes (DSGs) in response to *R. padi* infestation. Detailed data can be found in Table S9.

| Pathway name (DSGs 0 h)                  | P- value |
|------------------------------------------|----------|
| Flavin biosynthesis                      | 1.47E-02 |
| Spermine biosynthesis                    | 2.04E-02 |
| Coniferin metabolism                     | 3.44E-02 |
| Spermidine biosynthesis                  | 3.78E-02 |
| Aerobic respiration -- electron donor II | 4.62E-02 |

  

| Pathway name (DSGs 6 h)                             | P- value |
|-----------------------------------------------------|----------|
| Flavin biosynthesis                                 | 7.30E-03 |
| Spermine biosynthesis                               | 1.02E-02 |
| Spermidine biosynthesis                             | 1.93E-02 |
| Acrylonitrile degradation                           | 2.41E-02 |
| Aldoxime degradation                                | 2.41E-02 |
| Superpathway of polyamine biosynthesis II           | 3.07E-02 |
| Cyanide detoxification                              | 3.59E-02 |
| IAA biosynthesis IV                                 | 3.59E-02 |
| 1,4-dihydroxy-2-naphthoate biosynthesis II (plants) | 4.76E-02 |

  

| Pathway name (DSGs 24 h)                                                  | P- value |
|---------------------------------------------------------------------------|----------|
| Flavin biosynthesis                                                       | 1.47E-02 |
| Octaprenyl diphosphate biosynthesis                                       | 2.04E-02 |
| All trans undecaprenyl diphosphate biosynthesis                           | 2.04E-02 |
| Nonaprenyl diphosphate biosynthesis                                       | 2.04E-02 |
| Dodecaprenyl diphosphate biosynthesis                                     | 2.04E-02 |
| Hexaprenyl diphosphate biosynthesis                                       | 2.04E-02 |
| Decaprenyl diphosphate biosynthesis                                       | 2.04E-02 |
| Geranylgeranyldiphosphate biosynthesis                                    | 2.04E-02 |
| Heptaprenyl diphosphate biosynthesis                                      | 2.04E-02 |
| Tridecaprenyl diphosphate biosynthesis                                    | 2.04E-02 |
| Acrylonitrile degradation                                                 | 3.44E-02 |
| Aldoxime degradation                                                      | 3.44E-02 |
| Superpathway of geranylgeranyldiphosphate biosynthesis II (via MEP)       | 4.17E-02 |
| Superpathway of geranylgeranyldiphosphate biosynthesis I (via mevalonate) | 4.41E-02 |

**Figure S5. Overview of differentially spliced genes between B73 and Mo17.**

Maize B73 and Mo17 leaves were treated with 50 aphids per plant, and samples were collected at 6 and 24 h after *R. padi* treatment (untreated samples served as controls, depicted as 0 h). MetGenMAP was used for pathway enrichment analysis to identify metabolic functions of the differentially spliced genes (DSGs) between B73 and Mo17 under control, 6 h, and 24 h- *R. padi* treatment. Complete data can be found in Table S10.
